# Supplementary material for: Identification of Haplotype Tag Single-Nucleotide Polymorphisms within the PPAR Family Genes and Their Clinical Relevance in Patients with Major Trauma
Source: PubMed Central journal article supplement (PMC4847036; doi:10.3390/ijerph13040374), 2016-03-26
Supplement: ijerph-13-00374-s001.pdf [file ijerph-13-00374-s001.pdf]

# Identification of Haplotype Tag Single Nucleotide Polymorphisms within the PPAR Family Genes and Their Clinical Relevance in Patients with Major Trauma

Jun-Wei Gao, Ling Zeng, An-Qiang Zhang, Xiao Wang, Wei Pan, Ding-Yuan Du, Lian-Yang Zhang, Wei Gu and Jian-Xin Jiang

**Table S1.** The total SNPs identified from the 137 healthy Chinese Han Beijing (CHB) individuals of the HapMap project.

| Gene          | No. | Name       | Position | MAF   | Alleles |
|---------------|-----|------------|----------|-------|---------|
| PPAR $\alpha$ | 1   | rs9615487  | 44923635 | 0     | A/G     |
|               | 2   | rs4253781  | 44926043 | 0     | C/T     |
|               | 3   | rs4253617  | 44927264 | 0     | A/G     |
|               | 4   | rs4253621  | 44928018 | 0     | A/G     |
|               | 5   | rs4253622  | 44928055 | 0     | C/G     |
|               | 6   | rs4253623  | 44928770 | 0.174 | A/G     |
|               | 7   | rs4253630  | 44930682 | 0     | A/G     |
|               | 8   | rs135552   | 44931479 | 0.067 | C/T     |
|               | 9   | rs6008970  | 44931664 | 0.011 | C/T     |
|               | 10  | rs135551   | 44931685 | 0.081 | A/G     |
|               | 11  | rs5769129  | 44931719 | 0     | C/T     |
|               | 12  | rs6007965  | 44931786 | 0     | A/G     |
|               | 13  | rs135550   | 44931898 | 0.078 | C/T     |
|               | 14  | rs16994915 | 44931919 | 0     | A/C     |
|               | 15  | rs135549   | 44931972 | 0.25  | C/T     |
|               | 16  | rs135548   | 44932167 | 0.067 | A/G     |
|               | 17  | rs135547   | 44932314 | 0.078 | C/G     |
|               | 18  | rs8139731  | 44933016 | 0     | C/T     |
|               | 19  | rs2238833  | 44933264 | 0.012 | A/G     |
|               | 20  | rs4253783  | 44933960 | 0     | A/G     |
|               | 21  | rs135543   | 44933985 | 0.07  | C/T     |
|               | 22  | rs5769142  | 44934006 | 0     | A/G     |
|               | 23  | rs4253633  | 44934334 | 0     | A/G     |
|               | 24  | rs4253634  | 44934435 | 0     | G/T     |
|               | 25  | rs4253635  | 44934650 | 0     | A/G     |
|               | 26  | rs135542   | 44934701 | 0.067 | C/T     |
|               | 27  | rs4253784  | 44934799 | 0     | A/G     |
|               | 28  | rs6008974  | 44935586 | 0     | A/G     |
|               | 29  | rs129600   | 44935825 | 0.337 | A/G     |
|               | 30  | rs12160659 | 44936352 | 0.011 | G/T     |
|               | 31  | rs16994933 | 44937241 | 0     | C/T     |
|               | 32  | rs9306498  | 44937555 | 0     | A/G     |
|               | 33  | rs6008976  | 44937677 | 0     | A/G     |
|               | 34  | rs9680676  | 44938138 | 0     | C/G     |
|               | 35  | rs9615523  | 44939431 | 0     | C/T     |
|               | 36  | rs12166902 | 44939924 | 0     | C/T     |
|               | 37  | rs5769178  | 44939938 | 0.221 | A/C     |
|               | 38  | rs9626729  | 44940216 | 0     | A/G     |

Table S1. Cont.

| Gene | No. | Name       | Position | MAF   | Alleles |
|------|-----|------------|----------|-------|---------|
|      | 39  | rs9627046  | 44940230 | 0.209 | A/G     |
|      | 40  | rs11913649 | 44940741 | 0     | A/G     |
|      | 41  | rs4253640  | 44942002 | 0     | C/G     |
|      | 42  | rs135538   | 44943292 | 0.43  | C/G     |
|      | 43  | rs5769184  | 44944441 | 0     | A/C     |
|      | 44  | rs881740   | 44946052 | 0.209 | A/G     |
|      | 45  | rs5769219  | 44947547 | 0     | G/T     |
|      | 46  | rs4253653  | 44947566 | 0     | G/T     |
|      | 47  | rs4253655  | 44947835 | 0     | A/G     |
|      | 48  | rs4253786  | 44948413 | 0     | A/T     |
|      | 49  | rs9626736  | 44948896 | 0.151 | A/G     |
|      | 50  | rs9626737  | 44949006 | 0     | A/G     |
|      | 51  | rs12160049 | 44949046 | 0     | A/C     |
|      | 52  | rs6009058  | 44949617 | 0     | C/T     |
|      | 53  | rs4253662  | 44951408 | 0     | A/G     |
|      | 54  | rs4253788  | 44952315 | 0     | C/T     |
|      | 55  | rs4253678  | 44952674 | 0     | A/G     |
|      | 56  | rs4253679  | 44952679 | 0.012 | A/G     |
|      | 57  | rs6009081  | 44955815 | 0     | A/G     |
|      | 58  | rs1555208  | 44955874 | 0     | G/T     |
|      | 59  | rs11704856 | 44956144 | 0     | A/T     |
|      | 60  | rs4253681  | 44958264 | 0.222 | C/T     |
|      | 61  | rs4253682  | 44958361 | 0     | G/T     |
|      | 62  | rs7289836  | 44958675 | 0     | A/C     |
|      | 63  | rs4253684  | 44958811 | 0     | C/T     |
|      | 64  | rs4253692  | 44959755 | 0     | A/G     |
|      | 65  | rs9627100  | 44961405 | 0.012 | A/G     |
|      | 66  | rs7287085  | 44961638 | 0     | A/T     |
|      | 67  | rs761543   | 44963053 | 0     | C/T     |
|      | 68  | rs7364220  | 44963648 | 0.012 | A/G     |
|      | 69  | rs7364140  | 44963684 | 0     | A/G     |
|      | 70  | rs4253698  | 44964092 | 0     | C/T     |
|      | 71  | rs4253700  | 44964658 | 0     | C/T     |
|      | 72  | rs4253792  | 44964718 | 0     | C/T     |
|      | 73  | rs4253701  | 44964774 | 0.012 | A/G     |
|      | 74  | rs4253702  | 44964950 | 0     | A/G     |
|      | 75  | rs4253703  | 44965084 | 0     | C/T     |
|      | 76  | rs4253704  | 44965370 | 0     | C/G     |
|      | 77  | rs9626756  | 44965754 | 0     | A/G     |
|      | 78  | rs11912612 | 44966079 | 0     | G/T     |
|      | 79  | rs5769364  | 44966121 | 0     | A/G     |
|      | 80  | rs5769366  | 44966162 | 0     | A/G     |
|      | 81  | rs17661656 | 44966942 | 0     | C/G     |
|      | 82  | rs12330015 | 44968942 | 0.209 | A/G     |
|      | 83  | rs8138102  | 44970416 | 0.012 | A/G     |
|      | 84  | rs11703495 | 44972000 | 0     | A/T     |
|      | 85  | rs12170381 | 44972203 | 0     | A/C     |
|      | 86  | rs4253711  | 44973697 | 0.156 | A/G     |

Table S1. Cont.

| Gene | No. | Name       | Position | MAF   | Alleles |
|------|-----|------------|----------|-------|---------|
|      | 87  | rs4253712  | 44973699 | 0.156 | A/G     |
|      | 88  | rs7292459  | 44974766 | 0     | C/T     |
|      | 89  | rs11913971 | 44974800 | 0     | G/T     |
|      | 90  | rs7290473  | 44975951 | 0     | A/C     |
|      | 91  | rs5766714  | 44975994 | 0     | A/C     |
|      | 92  | rs4823613  | 44976971 | 0.221 | A/G     |
|      | 93  | rs8139794  | 44977611 | 0     | C/T     |
|      | 94  | rs12166868 | 44980224 | 0     | G/T     |
|      | 95  | rs4253713  | 44980575 | 0     | A/G     |
|      | 96  | rs4253719  | 44981311 | 0     | A/G     |
|      | 97  | rs5766741  | 44983854 | 0.222 | C/T     |
|      | 98  | rs5766743  | 44986042 | 0.163 | A/G     |
|      | 99  | rs6008129  | 44988387 | 0     | G/T     |
|      | 100 | rs4253727  | 44988626 | 0.011 | C/T     |
|      | 101 | rs4253728  | 44988731 | 0     | A/G     |
|      | 102 | rs4253729  | 44988897 | 0     | C/G     |
|      | 103 | rs5767686  | 44989852 | 0     | C/T     |
|      | 104 | rs4253736  | 44989925 | 0     | C/G     |
|      | 105 | rs4253739  | 44990414 | 0     | A/G     |
|      | 106 | rs4253743  | 44990971 | 0     | A/G     |
|      | 107 | rs5767700  | 44991336 | 0.222 | C/T     |
|      | 108 | rs4253744  | 44991568 | 0     | C/G     |
|      | 109 | rs13056831 | 44991745 | 0     | A/G     |
|      | 110 | rs4253747  | 44991901 | 0.198 | A/T     |
|      | 111 | rs4253748  | 44991930 | 0     | C/T     |
|      | 112 | rs6413511  | 44992811 | 0.022 | A/G     |
|      | 113 | rs1800204  | 44992834 | 0.012 | A/G     |
|      | 114 | rs1800206  | 44992938 | 0     | C/G     |
|      | 115 | rs4253754  | 44993808 | 0     | A/G     |
|      | 116 | rs4253755  | 44994040 | 0     | A/G     |
|      | 117 | rs1800235  | 44994569 | 0     | C/T     |
|      | 118 | rs4253756  | 44994722 | 0     | C/T     |
|      | 119 | rs4253757  | 44994781 | 0     | A/C     |
|      | 120 | rs12170204 | 44997864 | 0     | C/T     |
|      | 121 | rs6008193  | 44998802 | 0     | G/T     |
|      | 122 | rs6008197  | 44999080 | 0     | C/G     |
|      | 123 | rs6007662  | 44999709 | 0.14  | A/G     |
|      | 124 | rs5767743  | 45000658 | 0.256 | C/T     |
|      | 125 | rs4253759  | 45000792 | 0     | A/G     |
|      | 126 | rs4253760  | 45001048 | 0     | G/T     |
|      | 127 | rs4253763  | 45001264 | 0     | C/T     |
|      | 128 | rs4253764  | 45001452 | 0     | A/C     |
|      | 129 | rs4253765  | 45001552 | 0     | C/T     |
|      | 130 | rs6519979  | 45002201 | 0     | C/T     |
|      | 131 | rs11090819 | 45005170 | 0     | A/G     |
|      | 132 | rs4253772  | 45006267 | 0     | C/T     |
|      | 133 | rs1042311  | 45006444 | 0     | C/T     |
|      | 134 | rs4253798  | 45006948 | 0     | A/G     |
|      | 135 | rs4253776  | 45008143 | 0     | A/G     |

Table S1. Cont.

| Gene         | No. | Name       | Position | MAF   | Alleles |
|--------------|-----|------------|----------|-------|---------|
|              | 136 | rs4253777  | 45009286 | 0     | A/G     |
|              | 137 | rs4253778  | 45009298 | 0     | C/G     |
|              | 138 | rs4253779  | 45009457 | 0     | C/T     |
|              | 139 | rs4253800  | 45010115 | 0     | A/C     |
|              | 140 | rs5767779  | 45010515 | 0     | A/T     |
|              | 141 | rs9615264  | 45011253 | 0     | A/G     |
|              | 142 | rs11704979 | 45011658 | 0     | A/G     |
|              | 143 | rs6008259  | 45012446 | 0.012 | A/G     |
|              | 144 | rs11703765 | 45013924 | 0     | C/T     |
|              | 145 | rs11703766 | 45013935 | 0     | C/T     |
|              | 146 | rs4823487  | 45013985 | 0     | A/T     |
|              | 147 | rs12167302 | 45014144 | 0     | C/T     |
|              | 148 | rs3892755  | 45014263 | 0     | A/G     |
|              | 149 | rs9615784  | 45014671 | 0.012 | A/G     |
|              | 150 | rs7286168  | 45015134 | 0     | C/T     |
|              | 151 | rs5766804  | 45015639 | 0     | C/G     |
|              | 152 | rs10427717 | 45015701 | 0     | C/T     |
|              | 153 | rs9626814  | 45015918 | 0     | A/G     |
|              | 154 | rs4592961  | 45016034 | 0     | C/T     |
|              | 155 | rs9627268  | 45016310 | 0     | C/T     |
|              | 156 | rs10154348 | 45016823 | 0     | A/C     |
|              | 157 | rs1055659  | 45016962 | 0     | C/T     |
|              | 158 | rs11704508 | 45017204 | 0     | A/G     |
|              | 159 | rs12159525 | 45017242 | 0     | A/C     |
|              | 160 | rs14842    | 45018121 | 0     | A/T     |
|              | 161 | rs6008306  | 45018756 | 0     | A/G     |
|              | 162 | rs10154668 | 45018774 | 0     | A/G     |
|              | 163 | rs5767842  | 45019491 | 0     | C/T     |
|              | 164 | rs12159251 | 45019935 | 0     | C/T     |
|              | 165 | rs7284616  | 45020136 | 0     | C/T     |
|              | 166 | rs9626816  | 45020262 | 0     | A/G     |
|              | 167 | rs11705226 | 45021238 | 0     | A/C     |
| PPAR $\beta$ | 1   | rs9658056  | 35417538 | 0.067 | C/T     |
|              | 2   | rs9658057  | 35417635 | 0     | A/C     |
|              | 3   | rs9658059  | 35418444 | 0     | C/T     |
|              | 4   | rs6919734  | 35419966 | 0     | A/G     |
|              | 5   | rs2267664  | 35420232 | 0.233 | A/G     |
|              | 6   | rs9462073  | 35420918 | 0     | A/G     |
|              | 7   | rs9658068  | 35421954 | 0.093 | A/G     |
|              | 8   | rs9658069  | 35422466 | 0.011 | C/T     |
|              | 9   | rs9658070  | 35422846 | 0     | A/C     |
|              | 10  | rs9658071  | 35423103 | 0.012 | A/G     |
|              | 11  | rs9658072  | 35423118 | 0     | A/G     |
|              | 12  | rs9658073  | 35423968 | 0     | A/C     |
|              | 13  | rs9658074  | 35424109 | 0     | C/T     |
|              | 14  | rs6457813  | 35425279 | 0.044 | C/T     |
|              | 15  | rs4713851  | 35426762 | 0     | A/G     |
|              | 16  | rs7771323  | 35428426 | 0.011 | A/G     |
|              | 17  | rs6937510  | 35428789 | 0     | C/T     |

Table S1. Cont.

| Gene | No. | Name       | Position | MAF   | Alleles |
|------|-----|------------|----------|-------|---------|
|      | 18  | rs7744392  | 35430741 | 0.011 | A/G     |
|      | 19  | rs7758272  | 35430953 | 0.012 | A/G     |
|      | 20  | rs13206834 | 35431267 | 0     | A/C     |
|      | 21  | rs9942489  | 35431687 | 0.011 | A/T     |
|      | 22  | rs11758212 | 35431799 | 0     | A/G     |
|      | 23  | rs9942465  | 35432191 | 0     | A/C     |
|      | 24  | rs7746988  | 35432719 | 0.035 | C/T     |
|      | 25  | rs4278009  | 35433696 | 0     | C/T     |
|      | 26  | rs9658076  | 35434964 | 0     | C/T     |
|      | 27  | rs9658077  | 35435339 | 0.012 | A/G     |
|      | 28  | rs9658079  | 35435555 | 0     | C/T     |
|      | 29  | rs9462075  | 35435794 | 0     | C/T     |
|      | 30  | rs11967065 | 35436295 | 0     | C/G     |
|      | 31  | rs12530232 | 35437384 | 0     | G/T     |
|      | 32  | rs6901410  | 35438008 | 0.058 | C/T     |
|      | 33  | rs11961212 | 35438128 | 0.012 | C/T     |
|      | 34  | rs9348972  | 35438289 | 0.011 | C/T     |
|      | 35  | rs6902123  | 35438399 | 0.056 | C/T     |
|      | 36  | rs6457815  | 35438876 | 0.012 | C/T     |
|      | 37  | rs11751895 | 35439082 | 0     | C/T     |
|      | 38  | rs11962571 | 35440131 | 0     | A/T     |
|      | 39  | rs9470001  | 35441719 | 0.057 | C/G     |
|      | 40  | rs12181514 | 35441777 | 0     | A/C     |
|      | 41  | rs7757196  | 35443268 | 0     | A/G     |
|      | 42  | rs9658080  | 35445175 | 0.012 | A/G     |
|      | 43  | rs9658081  | 35445249 | 0.012 | C/T     |
|      | 44  | rs9658083  | 35445269 | 0.034 | C/G     |
|      | 45  | rs9658084  | 35445334 | 0.058 | C/T     |
|      | 46  | rs9296148  | 35445445 | 0.058 | A/G     |
|      | 47  | rs9470003  | 35445909 | 0     | C/G     |
|      | 48  | rs7754530  | 35445936 | 0     | G/T     |
|      | 49  | rs7772754  | 35446084 | 0     | C/G     |
|      | 50  | rs7739752  | 35447013 | 0.058 | C/T     |
|      | 51  | rs9368862  | 35447527 | 0     | C/T     |
|      | 52  | rs11751306 | 35447722 | 0     | A/C     |
|      | 53  | rs9368863  | 35447899 | 0     | C/T     |
|      | 54  | rs12173582 | 35448278 | 0.244 | C/T     |
|      | 55  | rs6913026  | 35448872 | 0     | C/G     |
|      | 56  | rs7750906  | 35448999 | 0.012 | G/T     |
|      | 57  | rs12524787 | 35449114 | 0     | G/T     |
|      | 58  | rs9470004  | 35449828 | 0     | C/T     |
|      | 59  | rs6919334  | 35449853 | 0.058 | A/G     |
|      | 60  | rs9658085  | 35452404 | 0.012 | C/T     |
|      | 61  | rs9470007  | 35457717 | 0.058 | C/T     |
|      | 62  | rs7770619  | 35458020 | 0.012 | C/T     |
|      | 63  | rs6937483  | 35458737 | 0     | A/G     |
|      | 64  | rs6922548  | 35461501 | 0.058 | A/G     |
|      | 65  | rs9394294  | 35461533 | 0     | A/G     |
|      | 66  | rs16868709 | 35462449 | 0     | C/G     |

Table S1. Cont.

| Gene | No. | Name       | Position | MAF   | Alleles |
|------|-----|------------|----------|-------|---------|
|      | 67  | rs12174594 | 35463391 | 0     | C/T     |
|      | 68  | rs9348973  | 35463404 | 0.012 | A/G     |
|      | 69  | rs9470011  | 35463423 | 0     | C/T     |
|      | 70  | rs3777744  | 35464121 | 0.291 | A/G     |
|      | 71  | rs9658098  | 35464509 | 0     | A/G     |
|      | 72  | rs9658099  | 35464514 | 0     | G/T     |
|      | 73  | rs9658100  | 35464618 | 0.058 | G/T     |
|      | 74  | rs9658101  | 35464761 | 0     | A/G     |
|      | 75  | rs3798343  | 35465671 | 0.233 | C/G     |
|      | 76  | rs9658107  | 35465763 | 0     | C/T     |
|      | 77  | rs9462078  | 35465952 | 0     | A/G     |
|      | 78  | rs6915115  | 35466923 | 0.012 | C/T     |
|      | 79  | rs6457816  | 35470826 | 0.058 | C/T     |
|      | 80  | rs9658108  | 35471735 | 0.011 | C/G     |
|      | 81  | rs9658112  | 35472771 | 0     | C/T     |
|      | 82  | rs9658115  | 35473024 | 0     | A/G     |
|      | 83  | rs9658117  | 35473389 | 0.023 | G/T     |
|      | 84  | rs2284197  | 35473435 | 0.044 | A/G     |
|      | 85  | rs9658118  | 35473806 | 0     | A/G     |
|      | 86  | rs9658119  | 35473945 | 0.012 | A/C     |
|      | 87  | rs9380506  | 35474868 | 0.193 | A/C     |
|      | 88  | rs1040436  | 35475887 | 0.256 | A/G     |
|      | 89  | rs10081143 | 35476761 | 0     | C/T     |
|      | 90  | rs9470015  | 35477062 | 0.189 | A/G     |
|      | 91  | rs2267665  | 35477469 | 0.198 | A/G     |
|      | 92  | rs1883322  | 35477784 | 0.256 | C/T     |
|      | 93  | rs1883321  | 35477812 | 0     | C/T     |
|      | 94  | rs2267666  | 35478706 | 0.256 | A/T     |
|      | 95  | rs9658120  | 35479057 | 0     | C/T     |
|      | 96  | rs9658121  | 35479278 | 0     | A/G     |
|      | 97  | rs9658122  | 35479313 | 0     | C/T     |
|      | 98  | rs9658123  | 35479323 | 0     | A/G     |
|      | 99  | rs9658125  | 35479412 | 0.047 | C/T     |
|      | 100 | rs9658126  | 35479533 | 0     | C/T     |
|      | 101 | rs7751726  | 35479602 | 0.012 | A/G     |
|      | 102 | rs7751481  | 35479731 | 0.256 | A/G     |
|      | 103 | rs9658127  | 35480031 | 0     | A/G     |
|      | 104 | rs9658128  | 35480060 | 0     | C/T     |
|      | 105 | rs2267667  | 35480502 | 0.256 | C/G     |
|      | 106 | rs9470017  | 35481971 | 0     | A/C     |
|      | 107 | rs2038068  | 35482439 | 0.256 | A/G     |
|      | 108 | rs2038067  | 35482444 | 0.198 | A/G     |
|      | 109 | rs6906237  | 35483504 | 0.047 | A/C     |
|      | 110 | rs9462081  | 35483984 | 0.012 | A/C     |
|      | 111 | rs6911817  | 35484265 | 0     | C/T     |
|      | 112 | rs4388282  | 35484328 | 0     | A/C     |
|      | 113 | rs4555908  | 35484381 | 0     | A/C     |
|      | 114 | rs4292520  | 35484392 | 0     | A/C     |
|      | 115 | rs4587165  | 35484657 | 0     | A/C     |

Table S1. Cont.

| Gene | No. | Name       | Position | MAF   | Alleles |
|------|-----|------------|----------|-------|---------|
|      | 116 | rs9658129  | 35485692 | 0     | A/G     |
|      | 117 | rs2267668  | 35485900 | 0.174 | A/G     |
|      | 118 | rs9658130  | 35486018 | 0     | A/G     |
|      | 119 | rs2267669  | 35486102 | 0.174 | A/G     |
|      | 120 | rs9658131  | 35486713 | 0     | G/T     |
|      | 121 | rs9658133  | 35486739 | 0     | C/T     |
|      | 122 | rs2016520  | 35486756 | 0.233 | C/T     |
|      | 123 | rs9658134  | 35486776 | 0     | A/G     |
|      | 124 | rs9658135  | 35486975 | 0     | A/G     |
|      | 125 | rs9658136  | 35487324 | 0     | C/T     |
|      | 126 | rs9658137  | 35487533 | 0     | A/G     |
|      | 127 | rs9658138  | 35487549 | 0     | G/T     |
|      | 128 | rs9658144  | 35488111 | 0     | A/G     |
|      | 129 | rs9296153  | 35488200 | 0     | C/T     |
|      | 130 | rs9658145  | 35488292 | 0     | C/T     |
|      | 131 | rs9658146  | 35488720 | 0     | C/G     |
|      | 132 | rs6942084  | 35488968 | 0     | A/G     |
|      | 133 | rs4713854  | 35489077 | 0     | A/C     |
|      | 134 | rs9470019  | 35491163 | 0     | A/G     |
|      | 135 | rs2299869  | 35491410 | 0.186 | C/T     |
|      | 136 | rs9717879  | 35492207 | 0     | G/T     |
|      | 137 | rs4513790  | 35492313 | 0     | A/G     |
|      | 138 | rs12198825 | 35492451 | 0     | A/G     |
|      | 139 | rs9462082  | 35494019 | 0.174 | A/G     |
|      | 140 | rs9296154  | 35495356 | 0.047 | A/G     |
|      | 141 | rs9658147  | 35495443 | 0     | A/G     |
|      | 142 | rs9658148  | 35495458 | 0     | A/G     |
|      | 143 | rs9658149  | 35495516 | 0     | A/C     |
|      | 144 | rs7762809  | 35495718 | 0.011 | C/T     |
|      | 145 | rs9658150  | 35495878 | 0     | A/G     |
|      | 146 | rs9658151  | 35496362 | 0.012 | C/T     |
|      | 147 | rs9658152  | 35496446 | 0     | C/T     |
|      | 148 | rs2076169  | 35496457 | 0.174 | A/G     |
|      | 149 | rs9658156  | 35497488 | 0     | C/T     |
|      | 150 | rs9658158  | 35498077 | 0     | A/G     |
|      | 151 | rs9658159  | 35499538 | 0     | A/G     |
|      | 152 | rs2076167  | 35499765 | 0.233 | C/T     |
|      | 153 | rs9658160  | 35499882 | 0     | C/T     |
|      | 154 | rs9658161  | 35500005 | 0     | C/G     |
|      | 155 | rs9658162  | 35500068 | 0     | A/G     |
|      | 156 | rs9658163  | 35500245 | 0     | C/T     |
|      | 157 | rs9658164  | 35500687 | 0     | A/G     |
|      | 158 | rs2076166  | 35501382 | 0.186 | A/G     |
|      | 159 | rs9658166  | 35501741 | 0     | C/T     |
|      | 160 | rs9658168  | 35502225 | 0     | A/T     |
|      | 161 | rs9470022  | 35502843 | 0     | C/T     |
|      | 162 | rs9658175  | 35502880 | 0     | C/T     |
|      | 163 | rs9658176  | 35502925 | 0     | C/T     |
|      | 164 | rs3734253  | 35502939 | 0     | A/C     |

Table S1. Cont.

| Gene          | No. | Name       | Position | MAF   | Alleles |
|---------------|-----|------------|----------|-------|---------|
|               | 165 | rs3734254  | 35502988 | 0.202 | C/T     |
|               | 166 | rs9658177  | 35503426 | 0.105 | A/G     |
|               | 167 | rs9658178  | 35503524 | 0     | C/T     |
|               | 168 | rs1053046  | 35503556 | 0.035 | A/G     |
|               | 169 | rs1053049  | 35503596 | 0.221 | C/T     |
|               | 170 | rs760783   | 35503982 | 0.186 | G/T     |
|               | 171 | rs7749160  | 35505105 | 0.186 | C/T     |
|               | 172 | rs9470023  | 35506335 | 0.012 | G/T     |
| PPAR $\gamma$ | 1   | rs9837686  | 12301825 | 0     | A/T     |
|               | 2   | rs13077495 | 12302751 | 0.023 | C/T     |
|               | 3   | rs17029002 | 12303932 | 0     | C/T     |
|               | 4   | rs2920502  | 12304195 | 0.244 | C/G     |
|               | 5   | rs17036160 | 12304783 | 0.023 | C/T     |
|               | 6   | rs17036183 | 12306536 | 0     | C/T     |
|               | 7   | rs12106668 | 12308495 | 0     | C/G     |
|               | 8   | rs2972164  | 12309416 | 0.116 | C/T     |
|               | 9   | rs6809631  | 12310647 | 0.408 | A/T     |
|               | 10  | rs6785890  | 12310816 | 0.43  | A/C     |
|               | 11  | rs11709077 | 12311507 | 0.023 | A/G     |
|               | 12  | rs6768587  | 12313115 | 0.43  | A/G     |
|               | 13  | rs4684846  | 12313849 | 0.43  | A/G     |
|               | 14  | rs9817428  | 12315267 | 0.43  | A/C     |
|               | 15  | rs17036188 | 12315925 | 0.337 | C/T     |
|               | 16  | rs12631028 | 12316406 | 0.462 | C/T     |
|               | 17  | rs12636461 | 12316830 | 0.43  | A/G     |
|               | 18  | rs13076055 | 12316996 | 0.43  | A/G     |
|               | 19  | rs12631819 | 12317861 | 0.337 | G/T     |
|               | 20  | rs11128596 | 12318117 | 0.43  | A/C     |
|               | 21  | rs11710969 | 12318591 | 0.43  | A/G     |
|               | 22  | rs7620165  | 12319441 | 0.058 | A/G     |
|               | 23  | rs11128597 | 12319636 | 0.43  | A/G     |
|               | 24  | rs17793693 | 12320971 | 0     | A/C     |
|               | 25  | rs10510410 | 12321738 | 0.233 | A/C     |
|               | 26  | rs10510411 | 12321849 | 0.233 | A/G     |
|               | 27  | rs6805419  | 12321911 | 0     | C/T     |
|               | 28  | rs10510412 | 12321962 | 0.222 | A/G     |
|               | 29  | rs17036242 | 12324490 | 0.233 | A/G     |
|               | 30  | rs13061415 | 12324924 | 0.233 | C/T     |
|               | 31  | rs10212597 | 12325680 | 0     | A/G     |
|               | 32  | rs12639162 | 12325781 | 0.233 | A/G     |
|               | 33  | rs12485478 | 12326223 | 0.198 | A/G     |
|               | 34  | rs12629240 | 12326574 | 0.233 | A/G     |
|               | 35  | rs9310401  | 12327468 | 0.233 | C/T     |
|               | 36  | rs11715073 | 12327971 | 0.233 | C/G     |
|               | 37  | rs10865710 | 12328198 | 0.233 | C/G     |
|               | 38  | rs3112394  | 12328303 | 0     | C/T     |
|               | 39  | rs11128598 | 12328326 | 0.233 | C/T     |
|               | 40  | rs13095716 | 12328612 | 0.222 | A/T     |
|               | 41  | rs13073869 | 12328993 | 0.233 | A/G     |



Table S1. Cont.

| Gene | No. | Name       | Position | MAF   | Alleles |
|------|-----|------------|----------|-------|---------|
|      | 42  | rs12496505 | 12331158 | 0.222 | A/G     |
|      | 43  | rs12487012 | 12331196 | 0.233 | C/T     |
|      | 44  | rs13070963 | 12331605 | 0.233 | C/T     |
|      | 45  | rs6800748  | 12332832 | 0     | A/G     |
|      | 46  | rs6800910  | 12332957 | 0     | A/G     |
|      | 47  | rs13433696 | 12333492 | 0.233 | A/G     |
|      | 48  | rs2067819  | 12334049 | 0.023 | A/G     |
|      | 49  | rs2067820  | 12334056 | 0     | A/G     |
|      | 50  | rs12636454 | 12335214 | 0.233 | C/T     |
|      | 51  | rs12633551 | 12335494 | 0.209 | C/T     |
|      | 52  | rs11128599 | 12335769 | 0.233 | A/G     |
|      | 53  | rs12495364 | 12336929 | 0.233 | C/T     |
|      | 54  | rs7646425  | 12338291 | 0     | A/G     |
|      | 55  | rs7646510  | 12338358 | 0     | A/G     |
|      | 56  | rs12493718 | 12338637 | 0.233 | G/T     |
|      | 57  | rs13083375 | 12340308 | 0.023 | G/T     |
|      | 58  | rs3892175  | 12343038 | 0     | A/G     |
|      | 59  | rs2920501  | 12343887 | 0     | C/T     |
|      | 60  | rs13064760 | 12344401 | 0.023 | C/T     |
|      | 61  | rs9814788  | 12344799 | 0.012 | C/T     |
|      | 62  | rs880663   | 12345083 | 0.222 | A/G     |
|      | 63  | rs17793951 | 12345737 | 0.058 | A/G     |
|      | 64  | rs12496005 | 12346082 | 0.167 | C/G     |
|      | 65  | rs4145574  | 12347074 | 0.233 | A/G     |
|      | 66  | rs4145573  | 12347386 | 0.233 | A/G     |
|      | 67  | rs2028760  | 12347882 | 0.233 | A/G     |
|      | 68  | rs3112395  | 12348094 | 0     | A/G     |
|      | 69  | rs1122648  | 12350391 | 0.233 | C/T     |
|      | 70  | rs1984668  | 12350712 | 0     | A/T     |
|      | 71  | rs9823137  | 12351178 | 0     | C/G     |
|      | 72  | rs17036314 | 12351745 | 0.222 | C/G     |
|      | 73  | rs10510417 | 12352294 | 0.222 | C/G     |
|      | 74  | rs11128601 | 12356165 | 0.233 | C/T     |
|      | 75  | rs9870196  | 12358664 | 0     | A/G     |
|      | 76  | rs7638903  | 12358714 | 0.023 | A/G     |
|      | 77  | rs12490265 | 12359542 | 0.133 | A/G     |
|      | 78  | rs17036321 | 12359599 | 0     | C/T     |
|      | 79  | rs12330440 | 12359870 | 0     | C/G     |
|      | 80  | rs11128603 | 12360828 | 0.022 | A/G     |
|      | 81  | rs4684847  | 12361337 | 0.023 | C/T     |
|      | 82  | rs12635309 | 12362281 | 0     | C/T     |
|      | 83  | rs10510418 | 12363563 | 0.116 | A/C     |
|      | 84  | rs17036326 | 12364313 | 0.023 | A/G     |
|      | 85  | rs12497191 | 12365135 | 0.209 | A/G     |
|      | 86  | rs17036328 | 12365484 | 0.023 | C/T     |
|      | 87  | rs11712510 | 12365695 | 0     | C/T     |
|      | 88  | rs11712531 | 12365713 | 0     | C/T     |
|      | 89  | rs6802898  | 12366207 | 0.023 | C/T     |
|      | 90  | rs2197423  | 12366583 | 0.023 | A/G     |

Table S1. Cont.

| Gene | No. | Name       | Position | MAF   | Alleles |
|------|-----|------------|----------|-------|---------|
|      | 91  | rs7614873  | 12366809 | 0     | G/T     |
|      | 92  | rs7647481  | 12366813 | 0.023 | A/G     |
|      | 93  | rs17036333 | 12367181 | 0.035 | A/G     |
|      | 94  | rs7649970  | 12367272 | 0.023 | C/T     |
|      | 95  | rs4135301  | 12367518 | 0     | A/C     |
|      | 96  | rs4135302  | 12367649 | 0     | A/G     |
|      | 97  | rs4135245  | 12367792 | 0     | C/G     |
|      | 98  | rs1801282  | 12368125 | 0.023 | C/G     |
|      | 99  | rs4135303  | 12368317 | 0     | C/T     |
|      | 100 | rs4135304  | 12369601 | 0     | A/G     |
|      | 101 | rs1899951  | 12369840 | 0.024 | C/T     |
|      | 102 | rs4135246  | 12370005 | 0     | A/T     |
|      | 103 | rs4135305  | 12370233 | 0     | A/G     |
|      | 104 | rs4684848  | 12370645 | 0.023 | A/G     |
|      | 105 | rs7615916  | 12370958 | 0.233 | A/G     |
|      | 106 | rs4135306  | 12371444 | 0     | G/T     |
|      | 107 | rs4135247  | 12371588 | 0.369 | A/G     |
|      | 108 | rs2881654  | 12371955 | 0.023 | A/G     |
|      | 109 | rs17817276 | 12372392 | 0.14  | A/G     |
|      | 110 | rs6788489  | 12372838 | 0     | A/T     |
|      | 111 | rs6778740  | 12373636 | 0     | C/T     |
|      | 112 | rs7627605  | 12374270 | 0     | C/T     |
|      | 113 | rs12629751 | 12374407 | 0.209 | C/T     |
|      | 114 | rs9851767  | 12374542 | 0     | A/G     |
|      | 115 | rs9829551  | 12375963 | 0     | A/G     |
|      | 116 | rs1064323  | 12377007 | 0     | A/G     |
|      | 117 | rs1373641  | 12377474 | 0.128 | C/T     |
|      | 118 | rs4135307  | 12377540 | 0     | A/G     |
|      | 119 | rs4135308  | 12377582 | 0     | C/T     |
|      | 120 | rs1373640  | 12377601 | 0.131 | A/G     |
|      | 121 | rs9883281  | 12378731 | 0     | A/G     |
|      | 122 | rs9812662  | 12379323 | 0     | G/T     |
|      | 123 | rs4135253  | 12379999 | 0.14  | -/T     |
|      | 124 | rs11718489 | 12383049 | 0     | A/C     |
|      | 125 | rs4135311  | 12383089 | 0     | A/T     |
|      | 126 | rs2938397  | 12383278 | 0.384 | A/G     |
|      | 127 | rs4135313  | 12383519 | 0     | A/G     |
|      | 128 | rs4135315  | 12383758 | 0     | A/G     |
|      | 129 | rs4135316  | 12383821 | 0     | C/T     |
|      | 130 | rs4135255  | 12383905 | 0     | A/G     |
|      | 131 | rs4135317  | 12383950 | 0     | G/T     |
|      | 132 | rs4135256  | 12384528 | 0     | A/G     |
|      | 133 | rs17817469 | 12385349 | 0     | C/T     |
|      | 134 | rs6801982  | 12385702 | 0     | A/C     |
|      | 135 | rs9858822  | 12386238 | 0     | A/C     |
|      | 136 | rs9842021  | 12386727 | 0     | G/T     |
|      | 137 | rs2921188  | 12387115 | 0.14  | A/G     |
|      | 138 | rs6442311  | 12387955 | 0     | A/G     |
|      | 139 | rs964232   | 12388237 | 0     | C/T     |

Table S1. Cont.

| Gene | No. | Name       | Position | MAF   | Alleles |
|------|-----|------------|----------|-------|---------|
|      | 140 | rs2120825  | 12388339 | 0.023 | G/T     |
|      | 141 | rs7650213  | 12388536 | 0     | G/T     |
|      | 142 | rs7641290  | 12389325 | 0     | C/T     |
|      | 143 | rs6809832  | 12389420 | 0     | C/T     |
|      | 144 | rs13091131 | 12389478 | 0     | A/C     |
|      | 145 | rs13091468 | 12389627 | 0     | A/C     |
|      | 146 | rs4135320  | 12391182 | 0     | A/G     |
|      | 147 | rs4135321  | 12391219 | 0     | A/G     |
|      | 148 | rs4135259  | 12393604 | 0     | C/T     |
|      | 149 | rs2028759  | 12393612 | 0.369 | C/T     |
|      | 150 | rs4135322  | 12393759 | 0     | C/T     |
|      | 151 | rs4135323  | 12394091 | 0     | A/C     |
|      | 152 | rs2921190  | 12394475 | 0.349 | C/T     |
|      | 153 | rs13306745 | 12396056 | 0.081 | G/T     |
|      | 154 | rs11914306 | 12396492 | 0     | A/C     |
|      | 155 | rs4135260  | 12397488 | 0     | C/T     |
|      | 156 | rs4135261  | 12398038 | 0     | C/T     |
|      | 157 | rs4135324  | 12398113 | 0     | C/G     |
|      | 158 | rs4135263  | 12398266 | 0     | C/T     |
|      | 159 | rs13316883 | 12399502 | 0     | A/T     |
|      | 160 | rs2972162  | 12399793 | 0.349 | C/T     |
|      | 161 | rs4135325  | 12400285 | 0     | A/G     |
|      | 162 | rs10510419 | 12401936 | 0     | G/T     |
|      | 163 | rs2959269  | 12404165 | 0     | C/T     |
|      | 164 | rs2938395  | 12404468 | 0.36  | A/G     |
|      | 165 | rs4135326  | 12404745 | 0     | A/G     |
|      | 166 | rs4135264  | 12404810 | 0     | A/G     |
|      | 167 | rs4135327  | 12404983 | 0     | A/G     |
|      | 168 | rs2959268  | 12405075 | 0.349 | C/T     |
|      | 169 | rs4135329  | 12405216 | 0     | A/G     |
|      | 170 | rs4135266  | 12406550 | 0     | A/T     |
|      | 171 | rs2938394  | 12406568 | 0.36  | A/G     |
|      | 172 | rs2938393  | 12407068 | 0     | A/C     |
|      | 173 | rs10510420 | 12408298 | 0     | A/C     |
|      | 174 | rs4135333  | 12409091 | 0     | A/C     |
|      | 175 | rs4135334  | 12409272 | 0     | A/T     |
|      | 176 | rs2938392  | 12409608 | 0.36  | A/G     |
|      | 177 | rs2938391  | 12409725 | 0     | C/T     |
|      | 178 | rs4135335  | 12409733 | 0.012 | C/T     |
|      | 179 | rs2938390  | 12409741 | 0     | C/G     |
|      | 180 | rs2292101  | 12409901 | 0.244 | C/T     |
|      | 181 | rs4371498  | 12411157 | 0     | G/T     |
|      | 182 | rs4135268  | 12412237 | 0.056 | C/G     |
|      | 183 | rs4135336  | 12412396 | 0     | A/G     |
|      | 184 | rs4135337  | 12412533 | 0     | C/G     |
|      | 185 | rs2921192  | 12413448 | 0     | G/T     |
|      | 186 | rs4135340  | 12414314 | 0     | A/G     |
|      | 187 | rs2938387  | 12414387 | 0.395 | C/T     |
|      | 188 | rs9876829  | 12414687 | 0     | A/T     |

Table S1. Cont.

| Gene | No. | Name       | Position | MAF   | Alleles |
|------|-----|------------|----------|-------|---------|
|      | 189 | rs4135341  | 12416553 | 0     | G/T     |
|      | 190 | rs4135342  | 12417578 | 0     | G/T     |
|      | 191 | rs2959273  | 12417731 | 0.36  | A/G     |
|      | 192 | rs2959272  | 12417833 | 0.36  | G/T     |
|      | 193 | rs1875796  | 12418657 | 0.36  | C/T     |
|      | 194 | rs4135275  | 12418844 | 0.477 | A/G     |
|      | 195 | rs12489347 | 12418877 | 0.233 | C/G     |
|      | 196 | rs9836965  | 12419275 | 0     | C/G     |
|      | 197 | rs1151996  | 12420807 | 0.36  | A/C     |
|      | 198 | rs4135276  | 12420830 | 0     | C/T     |
|      | 199 | rs4135277  | 12420846 | 0     | C/G     |
|      | 200 | rs1151997  | 12421004 | 0.36  | A/G     |
|      | 201 | rs4135278  | 12421468 | 0     | A/G     |
|      | 202 | rs11713869 | 12421481 | 0     | G/T     |
|      | 203 | rs1151999  | 12422153 | 0.36  | G/T     |
|      | 204 | rs1797895  | 12422814 | 0     | C/G     |
|      | 205 | rs1152000  | 12422895 | 0     | C/T     |
|      | 206 | rs1185785  | 12422950 | 0     | C/T     |
|      | 207 | rs4135343  | 12422964 | 0.012 | A/G     |
|      | 208 | rs4135344  | 12423142 | 0     | A/G     |
|      | 209 | rs4135345  | 12423299 | 0     | A/G     |
|      | 210 | rs4135280  | 12423994 | 0.244 | C/T     |
|      | 211 | rs3127609  | 12424013 | 0     | A/G     |
|      | 212 | rs4135347  | 12424026 | 0     | C/T     |
|      | 213 | rs4135281  | 12424453 | 0     | C/T     |
|      | 214 | rs796313   | 12424528 | 0.349 | G/T     |
|      | 215 | rs4135282  | 12424559 | 0     | C/T     |
|      | 216 | rs1373642  | 12424651 | 0     | A/C     |
|      | 217 | rs796290   | 12424683 | 0.372 | C/G     |
|      | 218 | rs4135283  | 12424793 | 0.244 | A/C     |
|      | 219 | rs4135284  | 12424866 | 0     | A/G     |
|      | 220 | rs1822825  | 12424963 | 0.36  | A/G     |
|      | 221 | rs709149   | 12425354 | 0.36  | A/G     |
|      | 222 | rs709150   | 12426337 | 0.36  | C/G     |
|      | 223 | rs11128604 | 12426593 | 0     | A/G     |
|      | 224 | rs9871668  | 12427388 | 0     | A/T     |
|      | 225 | rs1987536  | 12429505 | 0     | G/T     |
|      | 226 | rs709151   | 12429999 | 0.36  | C/T     |
|      | 227 | rs4135348  | 12431456 | 0     | G/T     |
|      | 228 | rs709154   | 12431834 | 0.375 | A/T     |
|      | 229 | rs4135285  | 12432119 | 0     | A/G     |
|      | 230 | rs4135350  | 12432324 | 0     | A/G     |
|      | 231 | rs4135351  | 12432461 | 0     | A/G     |
|      | 232 | rs4135352  | 12433208 | 0     | C/T     |
|      | 233 | rs13306747 | 12433274 | 0.035 | C/G     |
|      | 234 | rs13306746 | 12433334 | 0     | C/T     |
|      | 235 | rs796289   | 12436368 | 0     | C/T     |
|      | 236 | rs4135288  | 12436548 | 0     | A/G     |
|      | 237 | rs709156   | 12436615 | 0.128 | A/G     |

Table S1. Cont.

| Gene | No. | Name       | Position | MAF   | Alleles |
|------|-----|------------|----------|-------|---------|
|      | 238 | rs4135354  | 12436640 | 0.012 | C/T     |
|      | 239 | rs1699373  | 12436932 | 0     | G/T     |
|      | 240 | rs709157   | 12437024 | 0.047 | A/G     |
|      | 241 | rs7623946  | 12438717 | 0     | A/G     |
|      | 242 | rs7645903  | 12438826 | 0     | A/T     |
|      | 243 | rs7635807  | 12438970 | 0     | C/T     |
|      | 244 | rs1175540  | 12440243 | 0.372 | A/C     |
|      | 245 | rs4135292  | 12440956 | 0     | A/G     |
|      | 246 | rs1175542  | 12441214 | 0.372 | A/G     |
|      | 247 | rs1175543  | 12441433 | 0.384 | A/G     |
|      | 248 | rs1177809  | 12441490 | 0.349 | A/G     |
|      | 249 | rs4135293  | 12441596 | 0     | C/T     |
|      | 250 | rs4135295  | 12441783 | 0     | A/G     |
|      | 251 | rs4135296  | 12441939 | 0     | C/T     |
|      | 252 | rs1175544  | 12442044 | 0.349 | C/T     |
|      | 253 | rs2655259  | 12442543 | 0     | C/T     |
|      | 254 | rs4135356  | 12442613 | 0     | A/G     |
|      | 255 | rs7636598  | 12442827 | 0     | A/G     |
|      | 256 | rs7636854  | 12443118 | 0     | A/G     |
|      | 257 | rs7639159  | 12443273 | 0     | A/G     |
|      | 258 | rs7616804  | 12443286 | 0     | A/G     |
|      | 259 | rs7639005  | 12443299 | 0     | C/G     |
|      | 260 | rs13099634 | 12443463 | 0     | C/T     |
|      | 261 | rs13099828 | 12443589 | 0     | C/G     |
|      | 262 | rs17036700 | 12443627 | 0     | G/T     |
|      | 263 | rs3105364  | 12443690 | 0     | A/G     |
|      | 264 | rs6442312  | 12444449 | 0.011 | A/G     |
|      | 265 | rs6442313  | 12444667 | 0     | A/G     |
|      | 266 | rs3773360  | 12444718 | 0     | A/G     |
|      | 267 | rs4135359  | 12445043 | 0     | A/G     |
|      | 268 | rs1797912  | 12445239 | 0.384 | A/C     |
|      | 269 | rs4135360  | 12445314 | 0     | A/G     |
|      | 270 | rs4135361  | 12445663 | 0     | A/G     |
|      | 271 | rs6782475  | 12446330 | 0     | G/T     |
|      | 272 | rs6794024  | 12446362 | 0     | A/G     |
|      | 273 | rs4135362  | 12447095 | 0     | A/G     |
|      | 274 | rs7626560  | 12450088 | 0     | C/T     |
|      | 275 | rs7650895  | 12450162 | 0     | A/C     |
|      | 276 | rs3856806  | 12450557 | 0.244 | C/T     |
|      | 277 | rs1152003  | 12452055 | 0.477 | C/G     |
|      | 278 | rs6790976  | 12452742 | 0     | A/G     |
|      | 279 | rs9827787  | 12452816 | 0.013 | A/G     |
|      | 280 | rs10222537 | 12453380 | 0     | C/T     |
|      | 281 | rs9833097  | 12453817 | 0     | A/G     |

**Table S2.** The total common SNPs with a MAF  $\geq$  5% identified from the 137 healthy Chinese Han Beijing (CHB) individuals of the HapMap project.

| Gene          | No. | rs Number  | Position | MAF   | Alleles | Location on the Gene | Region     |
|---------------|-----|------------|----------|-------|---------|----------------------|------------|
| PPAR $\alpha$ | 1   | rs4253623  | 44928770 | 0.174 | A/G     | 44928770             | intron     |
|               | 2   | rs135552   | 44931479 | 0.067 | C/T     | 44931479             | intron     |
|               | 3   | rs135551   | 44931685 | 0.081 | A/G     | 44931685             | intron     |
|               | 4   | rs135550   | 44931898 | 0.078 | C/T     | 44931898             | intron     |
|               | 5   | rs135549   | 44931972 | 0.25  | C/T     | 44931972             | intron     |
|               | 6   | rs135548   | 44932167 | 0.067 | A/G     | 44932167             | intron     |
|               | 7   | rs135547   | 44932314 | 0.078 | C/G     | 44932314             | intron     |
|               | 8   | rs135543   | 44933985 | 0.07  | C/T     | 44933985             | intron     |
|               | 9   | rs135542   | 44934701 | 0.067 | C/T     | 44934701             | intron     |
|               | 10  | rs129600   | 44935825 | 0.337 | A/G     | 44935825             | intron     |
|               | 11  | rs5769178  | 44939938 | 0.221 | A/C     | 44939938             | intron     |
|               | 12  | rs9627046  | 44940230 | 0.209 | A/G     | 44940230             | intron     |
|               | 13  | rs135538   | 44943292 | 0.43  | C/G     | 44943292             | intron     |
|               | 14  | rs881740   | 44946052 | 0.209 | A/G     | 44946052             | intron     |
|               | 15  | rs9626736  | 44948896 | 0.151 | A/G     | 44948896             | intron     |
|               | 16  | rs4253681  | 44958264 | 0.222 | C/T     | 44958264             | intron     |
|               | 17  | rs12330015 | 44968942 | 0.209 | A/G     | 44968942             | intron     |
|               | 18  | rs4253711  | 44973697 | 0.156 | A/G     | 44973697             | intron     |
|               | 19  | rs4253712  | 44973699 | 0.156 | A/G     | 44973699             | intron     |
|               | 20  | rs4823613  | 44976971 | 0.221 | A/G     | 44976971             | intron     |
|               | 21  | rs5766741  | 44983854 | 0.222 | C/T     | 44983854             | intron     |
|               | 22  | rs5766743  | 44986042 | 0.163 | A/G     | 44986042             | intron     |
|               | 23  | rs5767700  | 44991336 | 0.222 | C/T     | 44991336             | intron     |
|               | 24  | rs4253747  | 44991901 | 0.198 | A/T     | 44991901             | intron     |
|               | 25  | rs6007662  | 44999709 | 0.14  | A/G     | 44999709             | intron     |
|               | 26  | rs5767743  | 45000658 | 0.256 | C/T     | 45000658             | intron     |
| PPAR $\beta$  | 27  | rs9658056  | 35417538 | 0.067 | C/T     | 35417538             | 5'flanking |
|               | 28  | rs2267664  | 35420232 | 0.233 | A/G     | 35420232             | intron     |
|               | 29  | rs9658068  | 35421954 | 0.093 | A/G     | 35421954             | intron     |
|               | 30  | rs6901410  | 35438008 | 0.058 | C/T     | 35438008             | intron     |
|               | 31  | rs6902123  | 35438399 | 0.056 | C/T     | 35438399             | intron     |
|               | 32  | rs9470001  | 35441719 | 0.057 | C/G     | 35441719             | intron     |
|               | 33  | rs9658084  | 35445334 | 0.058 | C/T     | 35445334             | intron     |
|               | 34  | rs9296148  | 35445445 | 0.058 | A/G     | 35445445             | intron     |
|               | 35  | rs7739752  | 35447013 | 0.058 | C/T     | 35447013             | intron     |
|               | 36  | rs12173582 | 35448278 | 0.244 | C/T     | 35448278             | intron     |
|               | 37  | rs6919334  | 35449853 | 0.058 | A/G     | 35449853             | intron     |
|               | 38  | rs9470007  | 35457717 | 0.058 | C/T     | 35457717             | intron     |
|               | 39  | rs6922548  | 35461501 | 0.058 | A/G     | 35461501             | intron     |
|               | 40  | rs3777744  | 35464121 | 0.291 | A/G     | 35464121             | intron     |
|               | 41  | rs9658100  | 35464618 | 0.058 | G/T     | 35464618             | intron     |
|               | 42  | rs3798343  | 35465671 | 0.233 | C/G     | 35465671             | intron     |
|               | 43  | rs6457816  | 35470826 | 0.058 | C/T     | 35470826             | intron     |
|               | 44  | rs9380506  | 35474868 | 0.193 | A/C     | 35474868             | intron     |
|               | 45  | rs1040436  | 35475887 | 0.256 | A/G     | 35475887             | intron     |
|               | 46  | rs9470015  | 35477062 | 0.189 | A/G     | 35477062             | intron     |
|               | 47  | rs2267665  | 35477469 | 0.198 | A/G     | 35477469             | intron     |

Table S2. Cont.

| Gene          | No. | rs Number  | Position | MAF   | Alleles | Location on the Gene | Region           |
|---------------|-----|------------|----------|-------|---------|----------------------|------------------|
|               | 48  | rs1883322  | 35477784 | 0.256 | C/T     | 35477784             | intron           |
|               | 49  | rs2267666  | 35478706 | 0.256 | A/T     | 35478706             | intron           |
|               | 50  | rs7751481  | 35479731 | 0.256 | A/G     | 35479731             | intron           |
|               | 51  | rs2267667  | 35480502 | 0.256 | C/G     | 35480502             | intron           |
|               | 52  | rs2038068  | 35482439 | 0.256 | A/G     | 35482439             | intron           |
|               | 53  | rs2038067  | 35482444 | 0.198 | A/G     | 35482444             | intron           |
|               | 54  | rs2267668  | 35485900 | 0.174 | A/G     | 35485900             | intron           |
|               | 55  | rs2267669  | 35486102 | 0.174 | A/G     | 35486102             | intron           |
|               | 56  | rs2016520  | 35486756 | 0.233 | C/T     | 35486756             | 5'UTR            |
|               | 57  | rs2299869  | 35491410 | 0.186 | C/T     | 35491410             | intron           |
|               | 58  | rs9462082  | 35494019 | 0.174 | A/G     | 35494019             | intron           |
|               | 59  | rs2076169  | 35496457 | 0.174 | A/G     | 35496457             | intron           |
|               | 60  | rs2076167  | 35499765 | 0.233 | C/T     | 35499765             | synonymous codon |
|               | 61  | rs2076166  | 35501382 | 0.186 | A/G     | 35501382             | intron           |
|               | 62  | rs3734254  | 35502988 | 0.202 | C/T     | 35502988             | 3'UTR            |
|               | 63  | rs9658177  | 35503426 | 0.105 | A/G     | 35503426             | 3'UTR            |
|               | 64  | rs1053049  | 35503596 | 0.221 | C/T     | 35503596             | 3'UTR            |
|               | 65  | rs760783   | 35503982 | 0.186 | G/T     | 35503982             | 3'flanking       |
|               | 66  | rs7749160  | 35505105 | 0.186 | C/T     | 35505105             | 3'flanking       |
| PPAR $\gamma$ | 67  | rs2920502  | 12304195 | 0.244 | C/G     | 12304195             | 5'flanking       |
|               | 68  | rs2972164  | 12309416 | 0.116 | C/T     | 12309416             | intron           |
|               | 69  | rs6809631  | 12310647 | 0.408 | A/T     | 12310647             | intron           |
|               | 70  | rs6785890  | 12310816 | 0.43  | A/C     | 12310816             | intron           |
|               | 71  | rs6768587  | 12313115 | 0.43  | A/G     | 12313115             | intron           |
|               | 72  | rs4684846  | 12313849 | 0.43  | A/G     | 12313849             | intron           |
|               | 73  | rs9817428  | 12315267 | 0.43  | A/C     | 12315267             | intron           |
|               | 74  | rs17036188 | 12315925 | 0.337 | C/T     | 12315925             | intron           |
|               | 75  | rs12631028 | 12316406 | 0.462 | C/T     | 12316406             | intron           |
|               | 76  | rs12636461 | 12316830 | 0.43  | A/G     | 12316830             | intron           |
|               | 77  | rs13076055 | 12316996 | 0.43  | A/G     | 12316996             | intron           |
|               | 78  | rs12631819 | 12317861 | 0.337 | G/T     | 12317861             | intron           |
|               | 79  | rs11128596 | 12318117 | 0.43  | A/C     | 12318117             | intron           |
|               | 80  | rs11710969 | 12318591 | 0.43  | A/G     | 12318591             | intron           |
|               | 81  | rs7620165  | 12319441 | 0.058 | A/G     | 12319441             | intron           |
|               | 82  | rs11128597 | 12319636 | 0.43  | A/G     | 12319636             | intron           |
|               | 83  | rs10510410 | 12321738 | 0.233 | A/C     | 12321738             | intron           |
|               | 84  | rs10510411 | 12321849 | 0.233 | A/G     | 12321849             | intron           |
|               | 85  | rs10510412 | 12321962 | 0.222 | A/G     | 12321962             | intron           |
|               | 86  | rs17036242 | 12324490 | 0.233 | A/G     | 12324490             | intron           |
|               | 87  | rs13061415 | 12324924 | 0.233 | C/T     | 12324924             | intron           |
|               | 88  | rs12639162 | 12325781 | 0.233 | A/G     | 12325781             | intron           |
|               | 89  | rs12485478 | 12326223 | 0.198 | A/G     | 12326223             | intron           |
|               | 90  | rs12629240 | 12326574 | 0.233 | A/G     | 12326574             | intron           |
|               | 91  | rs9310401  | 12327468 | 0.233 | C/T     | 12327468             | intron           |
|               | 92  | rs11715073 | 12327971 | 0.233 | C/G     | 12327971             | intron           |
|               | 93  | rs10865710 | 12328198 | 0.233 | C/G     | 12328198             | extron A2        |
|               | 94  | rs11128598 | 12328326 | 0.233 | C/T     | 12328326             | intron           |
|               | 95  | rs13095716 | 12328612 | 0.222 | A/T     | 12328612             | intron           |

Table S2. Cont.

| Gene | No. | rs Number  | Position | MAF   | Alleles | Location on the Gene | Region |
|------|-----|------------|----------|-------|---------|----------------------|--------|
|      | 96  | rs13073869 | 12328993 | 0.233 | A/G     | 12328993             | intron |
|      | 97  | rs12496505 | 12331158 | 0.222 | A/G     | 12331158             | intron |
|      | 98  | rs12487012 | 12331196 | 0.233 | C/T     | 12331196             | intron |
|      | 99  | rs13070963 | 12331605 | 0.233 | C/T     | 12331605             | intron |
|      | 100 | rs13433696 | 12333492 | 0.233 | A/G     | 12333492             | intron |
|      | 101 | rs12636454 | 12335214 | 0.233 | C/T     | 12335214             | intron |
|      | 102 | rs12633551 | 12335494 | 0.209 | C/T     | 12335494             | intron |
|      | 103 | rs11128599 | 12335769 | 0.233 | A/G     | 12335769             | intron |
|      | 104 | rs12495364 | 12336929 | 0.233 | C/T     | 12336929             | intron |
|      | 105 | rs12493718 | 12338637 | 0.233 | G/T     | 12338637             | intron |
|      | 106 | rs880663   | 12345083 | 0.222 | A/G     | 12345083             | intron |
|      | 107 | rs17793951 | 12345737 | 0.058 | A/G     | 12345737             | intron |
|      | 108 | rs12496005 | 12346082 | 0.167 | C/G     | 12346082             | intron |
|      | 109 | rs4145574  | 12347074 | 0.233 | A/G     | 12347074             | intron |
|      | 110 | rs4145573  | 12347386 | 0.233 | A/G     | 12347386             | intron |
|      | 111 | rs2028760  | 12347882 | 0.233 | A/G     | 12347882             | intron |
|      | 112 | rs1122648  | 12350391 | 0.233 | C/T     | 12350391             | intron |
|      | 113 | rs17036314 | 12351745 | 0.222 | C/G     | 12351745             | intron |
|      | 114 | rs10510417 | 12352294 | 0.222 | C/G     | 12352294             | intron |
|      | 115 | rs11128601 | 12356165 | 0.233 | C/T     | 12356165             | intron |
|      | 116 | rs12490265 | 12359542 | 0.133 | A/G     | 12359542             | intron |
|      | 117 | rs10510418 | 12363563 | 0.116 | A/C     | 12363563             | intron |
|      | 118 | rs12497191 | 12365135 | 0.209 | A/G     | 12365135             | intron |
|      | 119 | rs7615916  | 12370958 | 0.233 | A/G     | 12370958             | intron |
|      | 120 | rs4135247  | 12371588 | 0.369 | A/G     | 12371588             | intron |
|      | 121 | rs17817276 | 12372392 | 0.14  | A/G     | 12372392             | intron |
|      | 122 | rs12629751 | 12374407 | 0.209 | C/T     | 12374407             | intron |
|      | 123 | rs1373641  | 12377474 | 0.128 | C/T     | 12377474             | intron |
|      | 124 | rs1373640  | 12377601 | 0.131 | A/G     | 12377601             | intron |
|      | 125 | rs4135253  | 12379999 | 0.14  | -/T     | 12379999             | intron |
|      | 126 | rs2938397  | 12383278 | 0.384 | A/G     | 12383278             | intron |
|      | 127 | rs2921188  | 12387115 | 0.14  | A/G     | 12387115             | intron |
|      | 128 | rs2028759  | 12393612 | 0.369 | C/T     | 12393612             | intron |
|      | 129 | rs2921190  | 12394475 | 0.349 | C/T     | 12394475             | intron |
|      | 130 | rs13306745 | 12396056 | 0.081 | G/T     | 12396056             | intron |
|      | 131 | rs2972162  | 12399793 | 0.349 | C/T     | 12399793             | intron |
|      | 132 | rs2938395  | 12404468 | 0.36  | A/G     | 12404468             | intron |
|      | 133 | rs2959268  | 12405075 | 0.349 | C/T     | 12405075             | intron |
|      | 134 | rs2938394  | 12406568 | 0.36  | A/G     | 12406568             | intron |
|      | 135 | rs2938392  | 12409608 | 0.36  | A/G     | 12409608             | intron |
|      | 136 | rs2292101  | 12409901 | 0.244 | C/T     | 12409901             | intron |
|      | 137 | rs4135268  | 12412237 | 0.056 | C/G     | 12412237             | intron |
|      | 138 | rs2938387  | 12414387 | 0.395 | C/T     | 12414387             | intron |
|      | 139 | rs2959273  | 12417731 | 0.36  | A/G     | 12417731             | intron |
|      | 140 | rs2959272  | 12417833 | 0.36  | G/T     | 12417833             | intron |
|      | 141 | rs1875796  | 12418657 | 0.36  | C/T     | 12418657             | intron |
|      | 142 | rs4135275  | 12418844 | 0.477 | A/G     | 12418844             | intron |
|      | 143 | rs12489347 | 12418877 | 0.233 | C/G     | 12418877             | intron |



Table S2. Cont.

| Gene | No. | rs Number | Position | MAF   | Alleles | Location on the Gene | Region           |
|------|-----|-----------|----------|-------|---------|----------------------|------------------|
|      | 144 | rs1151996 | 12420807 | 0.36  | A/C     | 12420807             | intron           |
|      | 145 | rs1151997 | 12421004 | 0.36  | A/G     | 12421004             | intron           |
|      | 146 | rs1151999 | 12422153 | 0.36  | G/T     | 12422153             | intron           |
|      | 147 | rs4135280 | 12423994 | 0.244 | C/T     | 12423994             | intron           |
|      | 148 | rs796313  | 12424528 | 0.349 | G/T     | 12424528             | intron           |
|      | 149 | rs796290  | 12424683 | 0.372 | C/G     | 12424683             | intron           |
|      | 150 | rs4135283 | 12424793 | 0.244 | A/C     | 12424793             | intron           |
|      | 151 | rs1822825 | 12424963 | 0.36  | A/G     | 12424963             | intron           |
|      | 152 | rs709149  | 12425354 | 0.36  | A/G     | 12425354             | intron           |
|      | 153 | rs709150  | 12426337 | 0.36  | C/G     | 12426337             | intron           |
|      | 154 | rs709151  | 12429999 | 0.36  | C/T     | 12429999             | intron           |
|      | 155 | rs709154  | 12431834 | 0.375 | A/T     | 12431834             | intron           |
|      | 156 | rs709156  | 12436615 | 0.128 | A/G     | 12436615             | intron           |
|      | 157 | rs1175540 | 12440243 | 0.372 | A/C     | 12440243             | intron           |
|      | 158 | rs1175542 | 12441214 | 0.372 | A/G     | 12441214             | intron           |
|      | 159 | rs1175543 | 12441433 | 0.384 | A/G     | 12441433             | intron           |
|      | 160 | rs1177809 | 12441490 | 0.349 | A/G     | 12441490             | intron           |
|      | 161 | rs1175544 | 12442044 | 0.349 | C/T     | 12442044             | intron           |
|      | 162 | rs1797912 | 12445239 | 0.384 | A/C     | 12445239             | intron           |
|      | 163 | rs3856806 | 12450557 | 0.244 | C/T     | 12450557             | synonymous codon |
|      | 164 | rs1152003 | 12452055 | 0.477 | C/G     | 12452055             | 3'flanking       |

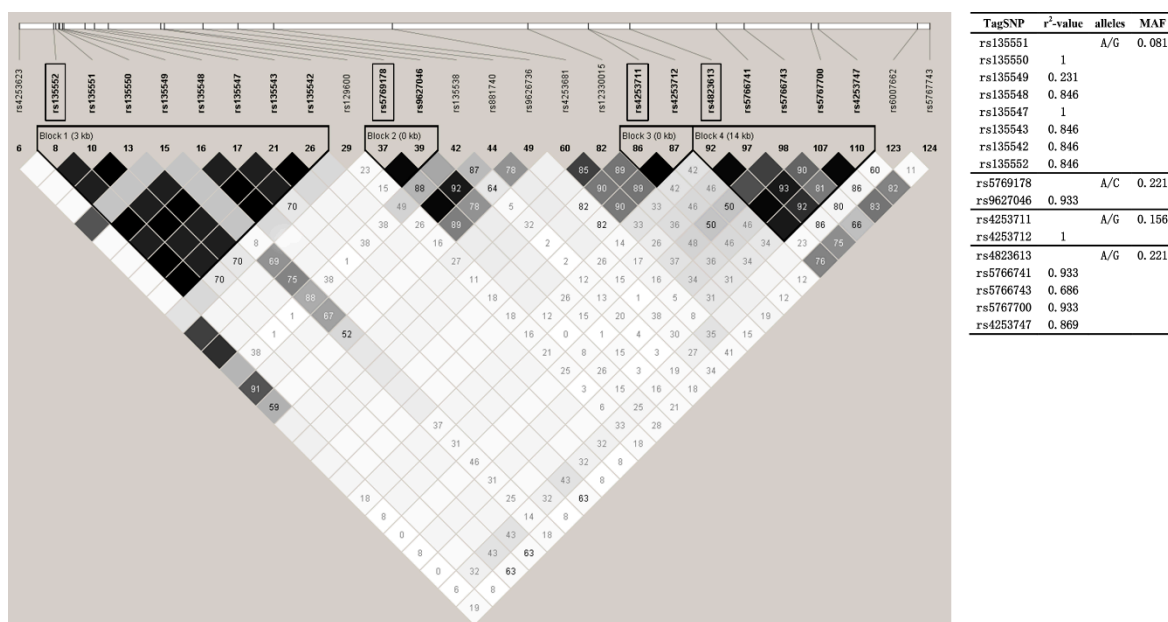

Figure S1. Linkage disequilibrium (LD) plot of the SNPs with a MAF ≥ 5% within the PPARα gene and 3 kb up- and down-stream regions are displayed using an r<sup>2</sup> black and white color scheme. Black represents very high LD (r<sup>2</sup> = 1), and white indicates the absence of correlation (r<sup>2</sup> = 0) between SNPs. The selected SNPs and SNPs that are indirectly measured by them are listed with corresponding r<sup>2</sup> values. The alleles of selected SNPs are given with their frequencies, according to the HapMap data for Chinese individuals from Beijing.
